# Supplementary material for: MBW complexes impinge on anthocyanidin reductase gene regulation for proanthocyanidin biosynthesis in persimmon fruit
Source: PubMed Central journal article supplement (PMC7044221; doi:10.1038/s41598-020-60635-w), 2020-02-26
Supplement: 41598_2020_60635_MOESM1_ESM.pdf [file 41598_2020_60635_MOESM1_ESM.pdf]

## Supplementary information

### **MBW complexes impinge on anthocyanidin reductase gene regulation for proanthocyanidin biosynthesis in persimmon fruit**

Francisco Gil-Muñoz<sup>1</sup>, Jesús A. Sánchez-Navarro<sup>2</sup>, Cristina Besada<sup>1</sup>, Alejandra Salvador<sup>1</sup>, María Luisa Badenes<sup>1</sup>, María del Mar Naval<sup>1</sup>, and Gabino Ríos<sup>1,\*</sup>

<sup>1</sup>Instituto Valenciano de Investigaciones Agrarias (IVIA), Moncada, Valencia, Spain

<sup>2</sup>Instituto de Biología Molecular y Celular de Plantas, Universidad Politécnica de Valencia-CSIC, Valencia, Spain

\*Corresponding author: Gabino Ríos. Instituto Valenciano de Investigaciones Agrarias (IVIA), Carretera CV-315, Km 10,7 Moncada 46113 (Spain). Phone: (+34) 963424140. e-mail: rios\_gab@gva.es

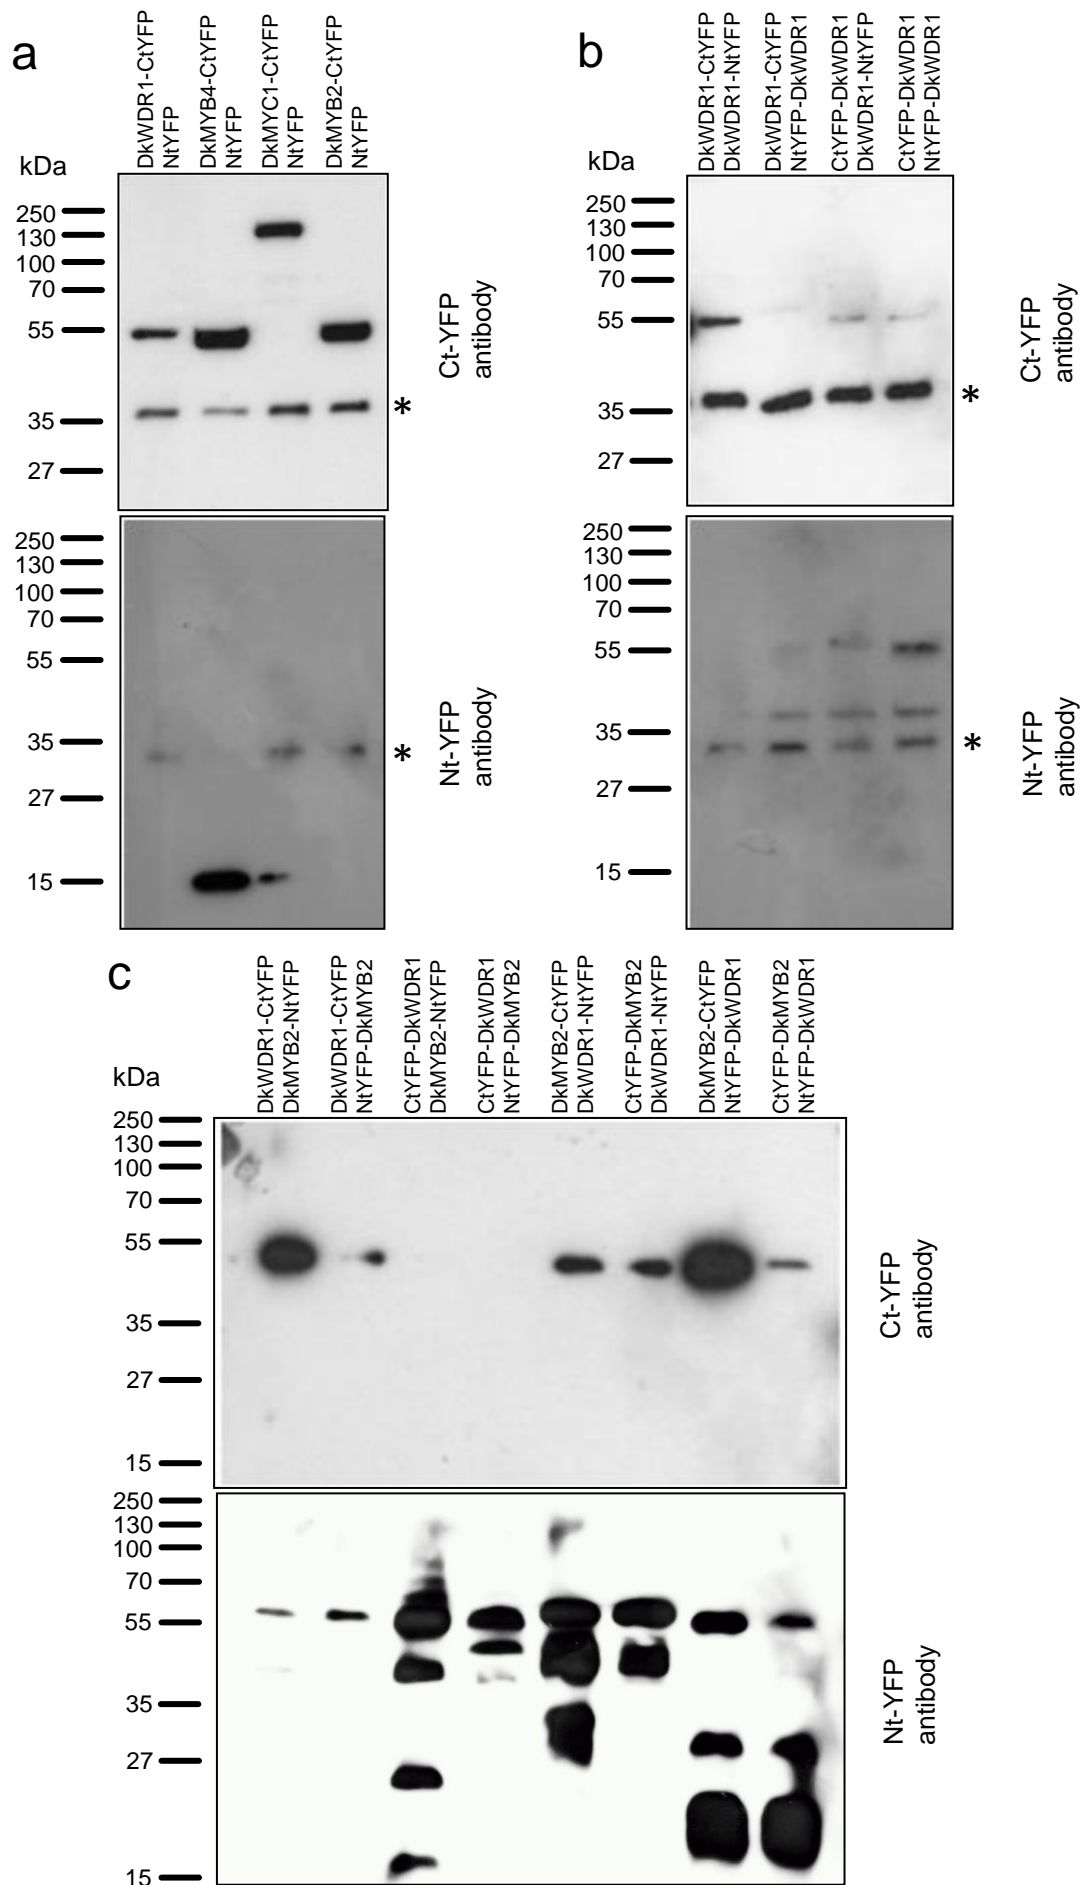

**Figure S1.** Western blot analysis of BiFC negative interaction combinations. Combinations are DkMYB2, DkMYB4, DkMYC1 and DkWDR1 with NtYFP (a), DkWDR1 with itself (b), and DkWDR1 with DkMYB2 (c). Molecular weight markers are shown on the left. Antibodies are shown on the right. Unspecific bands are labelled (\*).

**Table S1.** Primers used in this work.

|                                          | Forward                                   | Reverse                                           | Amplicon length (bp) |
|------------------------------------------|-------------------------------------------|---------------------------------------------------|----------------------|
| Primers used for promoter cloning        |                                           |                                                   |                      |
| <i>ANR</i> promoter (cloning)            | AAAAGTCTTGGGATCGTGCCTTC                   | ACGCTGCCTTGGCTCCTAACG                             | 1415                 |
| <i>DkMYB4</i> promoter (cloning)         | AATTCA CGGCATGGAAACGTGGT                  | CTCTTCTTCTGATATTTGTGACGCAG                        | 1392                 |
| <i>DkMYC1</i> promoter (cloning)         | CGTGCGAGCATTCA TGA GATGAGA                | ACTGTAAGTCCA TTGCA CCGTCTGA                       | 1268                 |
| Subcellular localization and BiFC        |                                           |                                                   |                      |
| DkMYB2-Fluorescent protein (FP)          | AGGATCGGTACCA TGGGAAGGAA GCCATGCTGTG      | CTGCA CCGGCCTAGCTGCGCTAAACCATGGGGT                |                      |
| FP-DkMYB2                                | GGTGCA GGA GCCA TGGGAAGGAA GCCATGCTGTG    | TCTAGGGA GCGCTAGCCTAGCCTAAACCATGGGGTTGG           |                      |
| DkMYB4-FP                                | AGGATCGGTACCA TGGGAAGAGCTCCTTGTGTTC       | CTGCA CCGGCCTAGCGATGAGCAATGATTCA GCAAAGG          |                      |
| FP-DkMYB4                                | GGTGCA GGA GCCA TGGGAAGAGCTCCTTGTGTTC     | TCTAGGGA GCGCTAGCTCAGATGAGCAATGATTCA GCAAAGG      |                      |
| DkMYC1-FP                                | AGGATCGGTACCA TGGCCGCTCCGCCTAGTT          | CTGCA CCGGCCTAGCATGTATTA TCTGATGTATCGCCCTCTTC     |                      |
| FP-DkMYC1                                | GGTGCA GGA GCCA TGGCCGCTCCGCCTAGTT        | TCTAGGGA GCGCTAGCTTAATGTATTA TCTGATGTATCGCCCTCTTC |                      |
| DkWDR1-FP                                | AGGATCGGTACCA TGGGA AATTCGA CCCTAGAG      | CTGCA CCGGCCTAGCAACTTTTAGAAGCTGCA TTTTGG          |                      |
| FP-DkWDR1                                | GGTGCA GGA GCCA TGGGA AATTCGA CCCTAGAG    | TCTAGGGA GCGCTAGCTTAAACTTTTAGAAGCTGCA TTTTGG      |                      |
| Transient expression vector construction |                                           |                                                   |                      |
| <i>ANR</i> -Luc                          | CGGAAGCTTAA AAGTCTTGGGATCGTGCCTTCAAC      | TATCTGCAGACGCTGCCTTGGCTCCTAACGTTG                 |                      |
| <i>DkMYB4</i> -Luc                       | CGCAAGCTTGTATA GCTTGAATGAA TGA AACTTTGTAG | TAACCATGGCTCTTCTTCTGATA TTTGTGACGCAG              |                      |
| <i>DkMYC1</i> -Luc                       | GCCAAGCTTCGATTTGGGATAATTTCAACTAAGGAGAAT   | TATCTGCAGCTACGCGCTCTGCTAGCTGTCAC                  |                      |
